# Supplementary material for: Accurate incorporation of hyperfine coupling in diabatic potential models using the effective relativistic coupling by asymptotic representation approach
Source: Royal Society of Chemistry journal article supplement (doi:10.1039/d4cp04170d), 2025-01-01
Supplement: d4cp04170d1.pdf [file d4cp04170d1.pdf]

**Supporting information:**

**Accurate incorporation of hyperfine coupling in diabatic potential models using the Effective Relativistic Coupling by Asymptotic Representation approach**

Maik Vossel, Iordanis Tsakontsis, Nicole Weike, and Wolfgang Eisfeld

*Theoretische Chemie, Universität Bielefeld, Postfach 100131, D-33501 Bielefeld, Germany<sup>a)</sup>*

---

<sup>a)</sup>Electronic mail: [wolfgang.eisfeld@uni-bielefeld.de](mailto:wolfgang.eisfeld@uni-bielefeld.de)

In this supporting information we provide the representation for the hyperfine coupling matrices of dipole-dipole Eq. (12) and quadrupole Eq. (13) operators for the  ${}^2P_{3/2}$  and  ${}^2P_{1/2}$  states of the Iodine atom referenced in Sec. III.A. The matrices are given in the spinor basis  $|j^I, m_j^I, i^I, m_i^I\rangle$  with  $j^I = 3/2$  and  $i^I = 5/2$  for the  ${}^2P_{3/2}$  state and  $j^I = 1/2$  and  $i^I = 5/2$  for the  ${}^2P_{1/2}$  state.

Representation of the effective hyperfine dipole-dipole operator for the  ${}^2P_{1/2}$  state.

$$\mathbf{H}^{\text{md}} = A_I^{\text{md}} \begin{pmatrix} \frac{5}{4} & 0 & 0 & 0 & 0 & 0 & 0 & 0 & 0 & 0 & 0 & 0 \\ 0 & -\frac{5}{4} & \sqrt{\frac{5}{4}} & 0 & 0 & 0 & 0 & 0 & 0 & 0 & 0 & 0 \\ 0 & \sqrt{\frac{5}{4}} & \frac{3}{4} & 0 & 0 & 0 & 0 & 0 & 0 & 0 & 0 & 0 \\ 0 & 0 & 0 & -\frac{3}{4} & \sqrt{2} & 0 & 0 & 0 & 0 & 0 & 0 & 0 \\ 0 & 0 & 0 & \sqrt{2} & \frac{1}{4} & 0 & 0 & 0 & 0 & 0 & 0 & 0 \\ 0 & 0 & 0 & 0 & 0 & -\frac{1}{4} & \frac{3}{2} & 0 & 0 & 0 & 0 & 0 \\ 0 & 0 & 0 & 0 & 0 & \frac{3}{2} & -\frac{1}{4} & 0 & 0 & 0 & 0 & 0 \\ 0 & 0 & 0 & 0 & 0 & 0 & 0 & \frac{1}{4} & \sqrt{2} & 0 & 0 & 0 \\ 0 & 0 & 0 & 0 & 0 & 0 & 0 & \sqrt{2} & -\frac{3}{4} & 0 & 0 & 0 \\ 0 & 0 & 0 & 0 & 0 & 0 & 0 & 0 & 0 & \frac{3}{4} & \sqrt{\frac{5}{4}} & 0 \\ 0 & 0 & 0 & 0 & 0 & 0 & 0 & 0 & 0 & \sqrt{\frac{5}{4}} & -\frac{5}{4} & 0 \\ 0 & 0 & 0 & 0 & 0 & 0 & 0 & 0 & 0 & 0 & 0 & \frac{5}{4} \end{pmatrix}$$
